# Supplementary material for: Regnase-1-mediated post-transcriptional regulation is essential for hematopoietic stem and progenitor cell homeostasis
Source: PubMed Central journal article supplement (PMC6403248; doi:10.1038/s41467-019-09028-w), 2019-03-06
Supplement: 41467_2019_9028_MOESM1_ESM.pdf [file 41467_2019_9028_MOESM1_ESM.pdf]

## Supplementary Information

Regnase-1-mediated post-transcriptional regulation is essential for hematopoietic stem and progenitor cell homeostasis

Kidoya et al.

Supplementary Figure 1

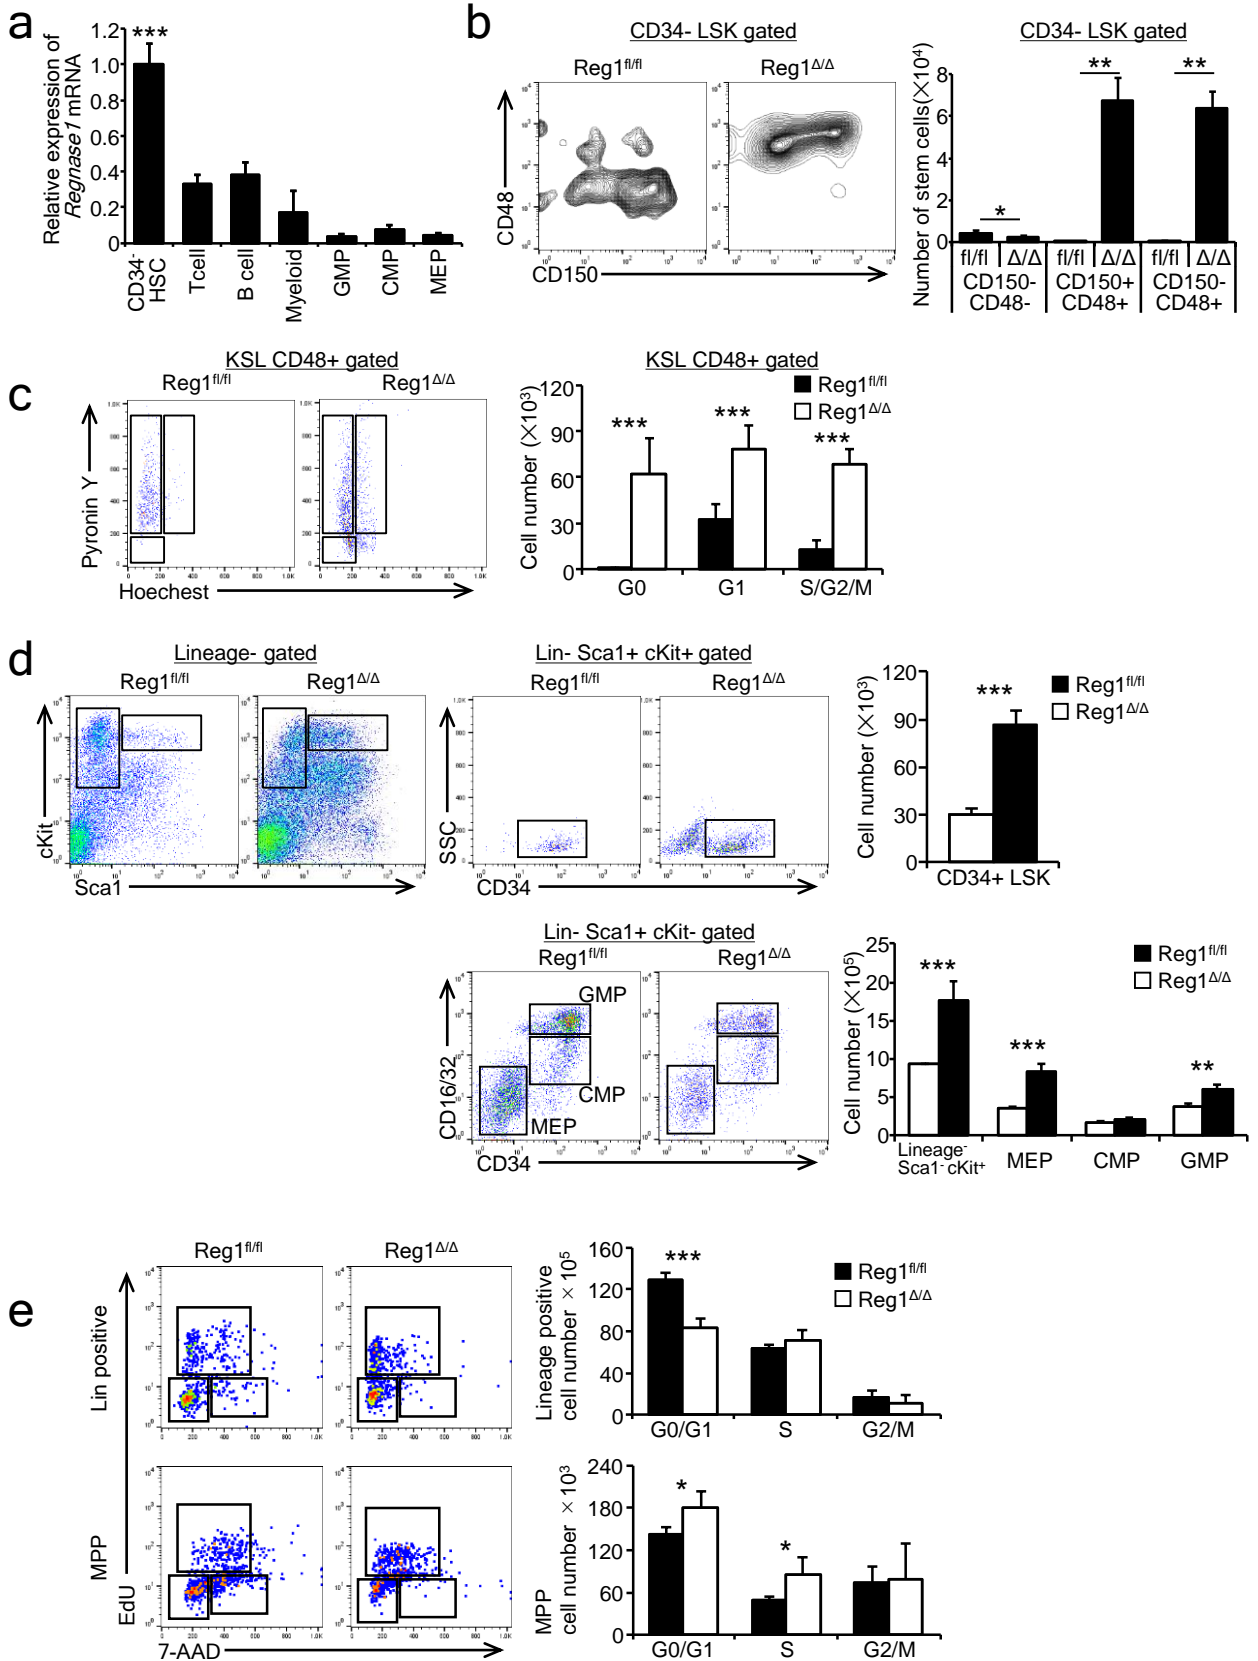

**Supplementary Figure 1. Expression of Regnase-1 and the effect of Regnase-1 deficiency on the cell cycle in progenitors and differentiated blood cells.**

(a) *Regnase-1* mRNA expression in LSK CD34<sup>-</sup> Flt3<sup>-</sup> (CD34<sup>-</sup> HSC), CD45<sup>+</sup> CD3<sup>+</sup> cells (T cells), CD45<sup>+</sup> B220<sup>+</sup> (B cells), CD45<sup>+</sup> CD11b<sup>+</sup> cells (Myeloid), Lin<sup>-</sup> cKit<sup>+</sup> Sca1<sup>-</sup> CD34<sup>+</sup> CD16/32<sup>high</sup> (GMP), Lin<sup>-</sup> cKit<sup>+</sup> Sca1<sup>-</sup> CD34<sup>+</sup> CD16/32<sup>mid</sup> (CMP) and Lin<sup>-</sup> cKit<sup>+</sup> Sca1<sup>-</sup> CD34<sup>-</sup> CD16/32<sup>low</sup> (EMP) cells from BM of 8 week-old adult mice (n = 3 per group; 2 independent experiments). (b) Representative flow cytometric analysis of CD34<sup>-</sup> LSK cells CD48 and CD150 expression in 8 week-old control (fl/fl) or Regnase-1-KO ( $\Delta/\Delta$ ) mice (n=3 per group; 2 independent experiments). Quantification of CD150<sup>+</sup> CD48<sup>-</sup>, CD150<sup>+</sup> CD48<sup>+</sup> and CD150<sup>-</sup> CD48<sup>+</sup> cells of control (fl/fl) and Regnase-1-KO ( $\Delta/\Delta$ ) mice. (c) Representative cell cycle plots of CD48<sup>+</sup> LSK populations in BM from control (fl/fl) or Regnase-1-KO ( $\Delta/\Delta$ ) mice using Hoechst 33342/pyronin Y staining (n =3 per group; 2 independent experiments). Graph showing number of cells in the G0, G1 and S/G2/M phases. (d) Flow cytometric analysis of CD34<sup>+</sup> LSK, Lin<sup>-</sup> cKit<sup>+</sup> Sca1<sup>-</sup> cells, Lin<sup>-</sup> cKit<sup>+</sup> Sca1<sup>-</sup> CD34<sup>+</sup> CD16/32<sup>high</sup> (GMP), Lin<sup>-</sup> cKit<sup>+</sup> Sca1<sup>-</sup> CD34<sup>+</sup> CD16/32<sup>mid</sup> (CMP) and Lin<sup>-</sup> cKit<sup>+</sup> Sca1<sup>-</sup> CD34<sup>-</sup> CD16/32<sup>low</sup> (EMP) cells in BM of mice 4 weeks after transplantation of control (fl/fl) or Regnase-1-KO ( $\Delta/\Delta$ ) KSLs (n=3 per group; 2 independent experiments). Quantification of CD34<sup>+</sup> LSK, Lin<sup>-</sup> cKit<sup>+</sup> Sca1<sup>-</sup> cells, GMP, CMP and MEP in bone marrow MNCs. (e) Cell-cycle analysis of control (fl/fl) or Regnase-1-KO ( $\Delta/\Delta$ ) BM Lin<sup>+</sup> cells and MPP populations by flow cytometry using EdU/7AAD staining. Dot plots indicating the frequency of HSC (EdU<sup>-</sup> 7AAD<sup>-</sup>), G2/M (EdU<sup>+</sup>), or S (EdU<sup>+</sup> 7AAD<sup>+</sup>) phase of the cell cycle (n =3 per group; 3 independent experiments). Error bars indicate mean  $\pm$  SD. \*p < 0.05; \*\*p < 0.01, \*\*\*p < 0.005, t-test.

Supplementary Figure 2

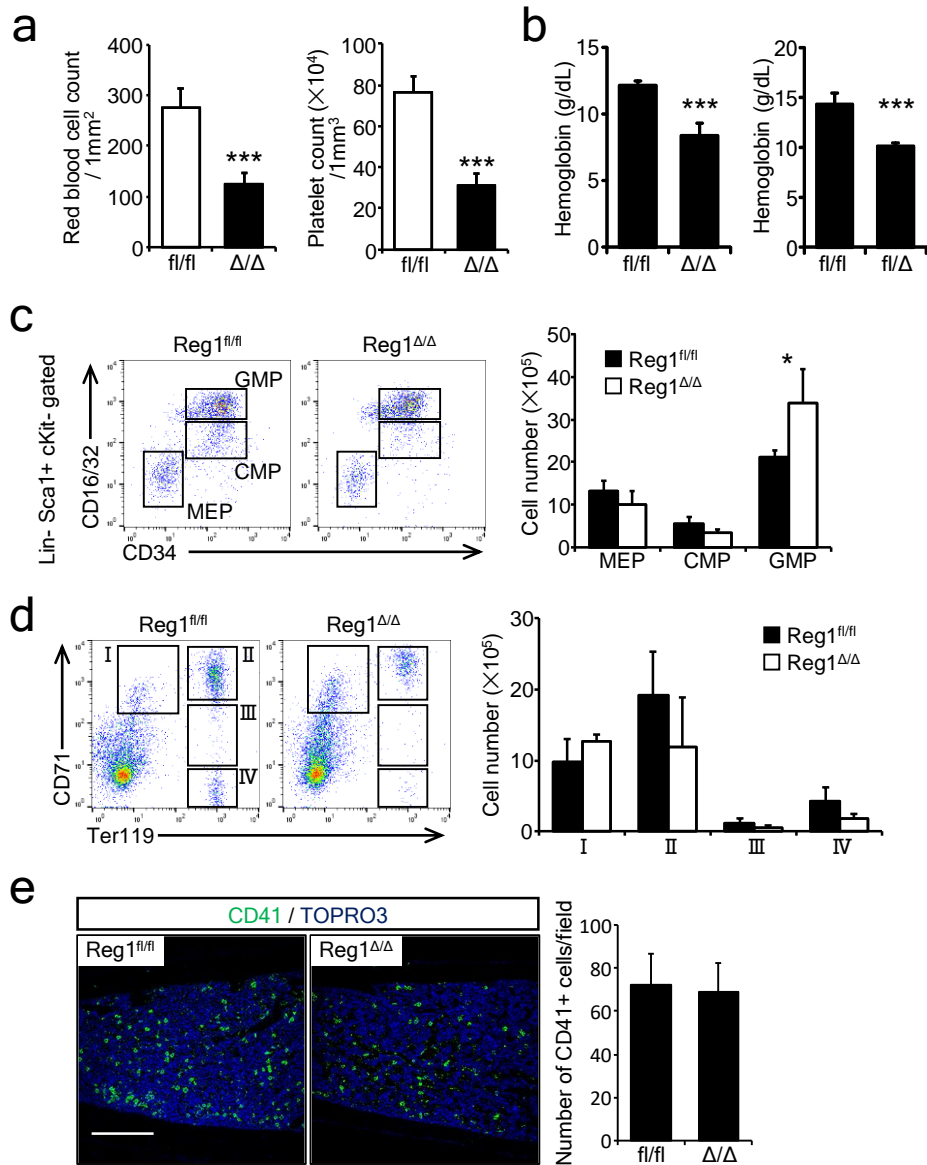

**Supplementary Figure 2. Analysis of erythro-megakaryopoiesis in Regnase1-KO mice.**

(a) Peripheral red blood cell and platelet counts in blood samples from 8 week-old control (fl/fl) or Regnase-1-KO ( $\Delta/\Delta$ ) mice. (n =3 per group; 2 independent experiments). (b) Peripheral blood hemoglobin levels of 8 week-old control (fl/fl) and Regnase-1-KO ( $\Delta/\Delta$ ) mice (right graph) or 12 month-old control (fl/fl) and Regnase-1 hetero mutant (flox/ $\Delta$ ) mice (left graph) (n =3 per group; 3 independent experiments). (c) Flow cytometric analysis of Lin<sup>-</sup> cKit<sup>+</sup> Sca1<sup>-</sup> CD34<sup>+</sup> CD16/32<sup>high</sup> (GMP), Lin<sup>-</sup> cKit<sup>+</sup> Sca1<sup>-</sup> CD34<sup>+</sup> CD16/32<sup>mid</sup> (CMP) and Lin<sup>-</sup> cKit<sup>+</sup> Sca1<sup>-</sup> CD34<sup>-</sup> CD16/32<sup>low</sup> (MEP) cells in BM from 8 week-old mice as indicated (n=3 per group; 2 independent experiments). Quantification of GMP, CMP and MEP in bone marrow MNCs. (d) Flow cytometric analysis of erythroid progenitors in BM from 8 week-old mice as indicated (n =3 per group; 2 independent experiments). Quantification of erythroid subsets in bone marrow. (e) Immunohistochemical staining of CD41<sup>+</sup> megakaryocytes in control and Regnase-1-KO ( $\Delta/\Delta$ ) BM (n =3 per group). The scale bars represent 400  $\mu\text{m}$ . Error bars indicate mean  $\pm$  SD. \*p < 0.05; \*\*p < 0.01, \*\*\*p < 0.005.

Supplementary Figure 3

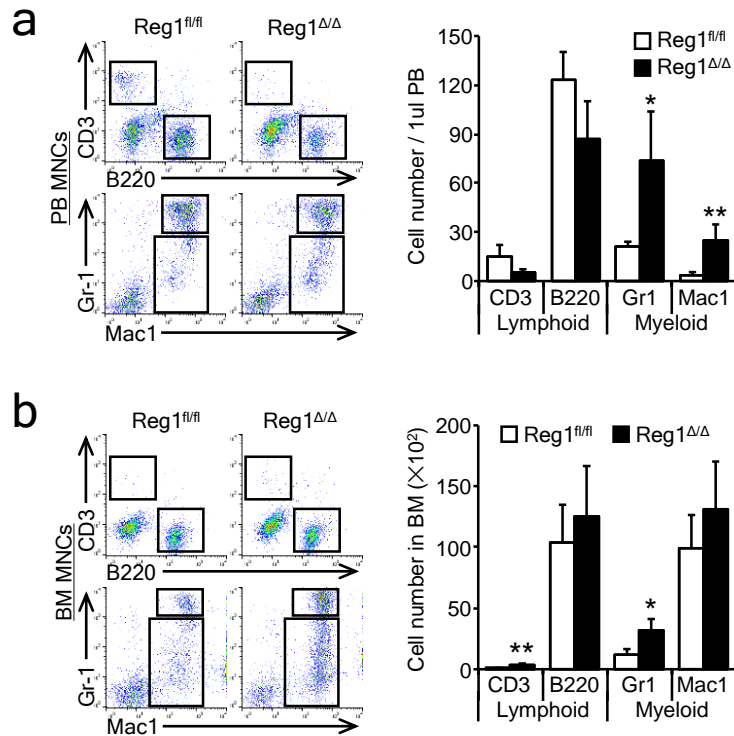

**Supplementary Figure 3. Analysis of peripheral blood and BM cells of juvenile Regnase-1-deficient mice.**

(a) Flow cytometric analysis of lymphocytes and monocytes in peripheral blood mononuclear cells (MNCs) from 2 week-old mice as indicated (n =3 per group; 2 independent experiments). Quantification of lymphoid and myeloid cells in peripheral blood MNCs. (b) Flow cytometric analysis of lymphocytes and monocytes in BM MNCs from 2 week-old mice as indicated (n =3 per group; 2 independent experiments). Quantification of lymphoid and myeloid cells in BM MNCs. Error bars indicate mean  $\pm$  SD. \*p < 0.05; \*\*p < 0.01, t-test.

Supplementary Figure 4

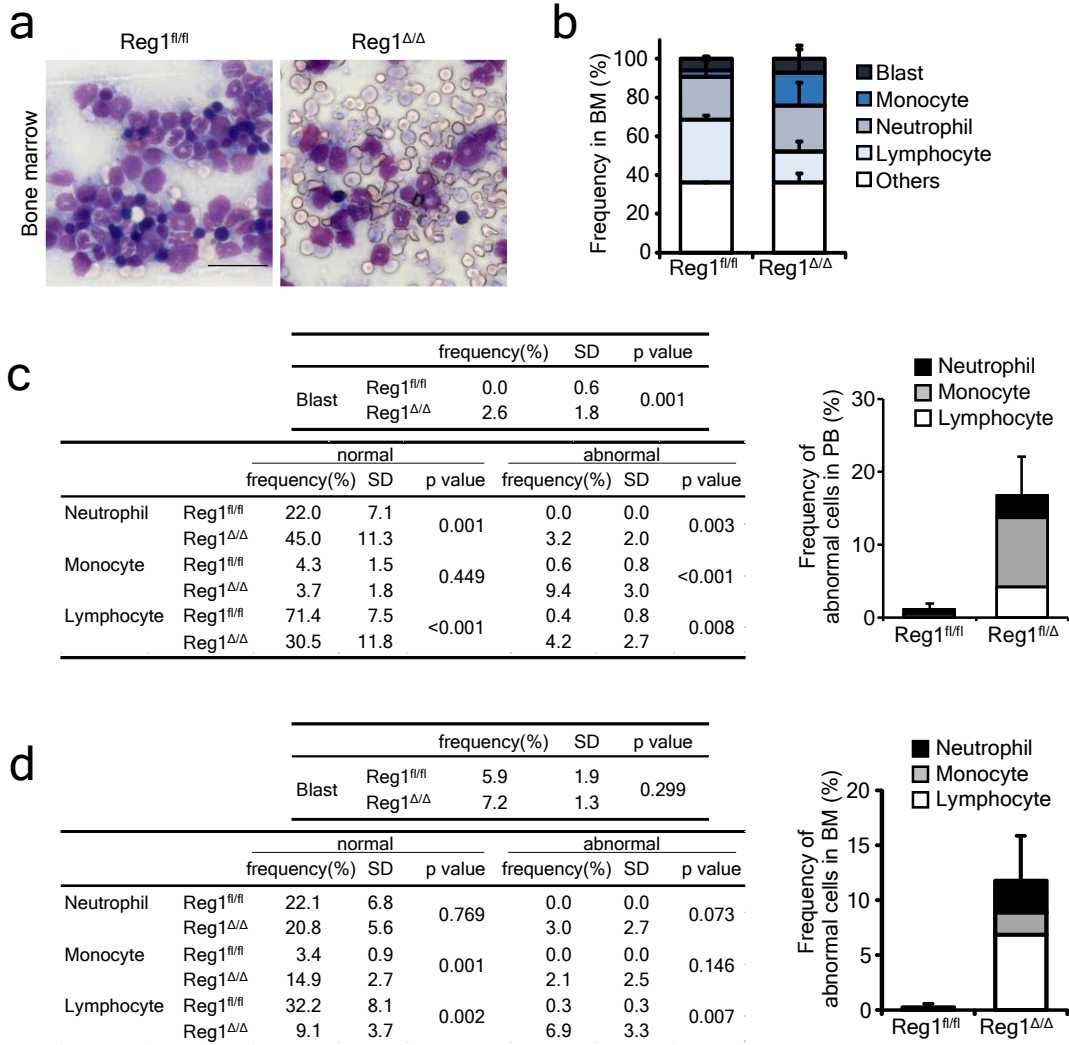

**Supplementary Figure 4. Pathological analysis of BM cell of Regnase1-deficient mice.**

(a) Representative field of Wright-Giemsa-stained BM smears of 8 week-old control (fl/fl) and Regnase-1-KO ( $\Delta/\Delta$ ) mice. The scale bar shows 30  $\mu$ m. (b) Quantification of frequencies of blasts and other MNCs BM on Wright-Giemsa-staining (n =3 per group; 3 independent experiments). (c) Quantification of abnormal cells in the PB of Reg1<sup>fl/fl</sup> mice (n = 6 per group). (d) Quantification of abnormal cells in the BM of Reg1<sup>Δ/Δ</sup> mice (n = 3 per group; 2 independent experiments).

Supplementary Figure 5

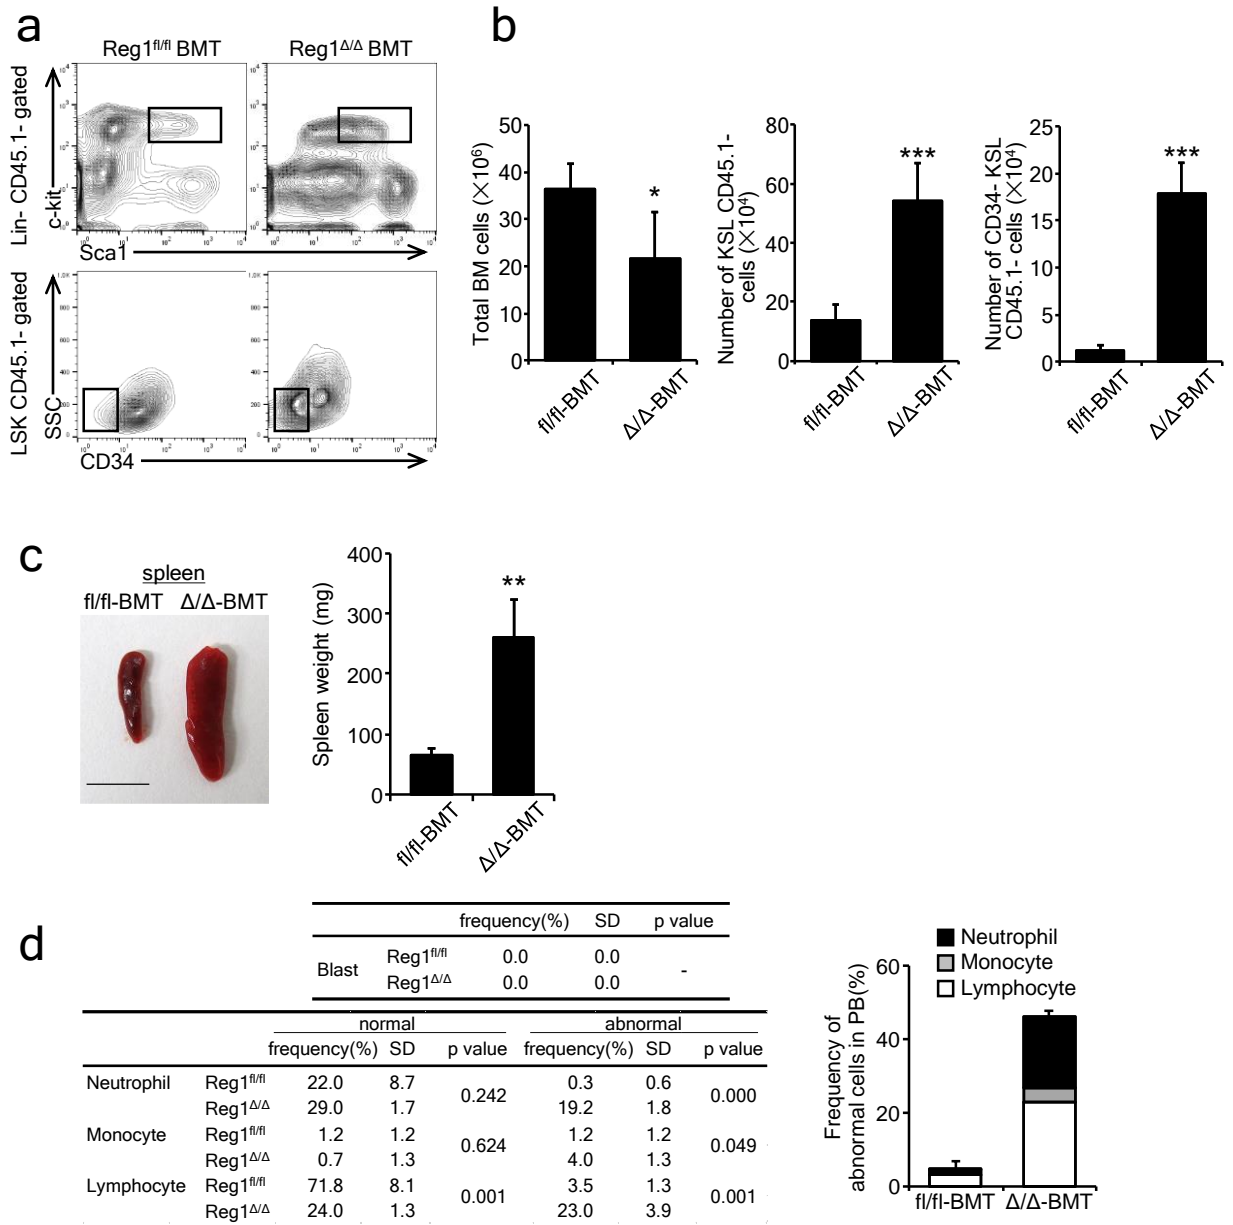

**Supplementary Figure 5. Transplantation of leukemic BM mononuclear cells of Regnase-1-deficient mice to wild-type mice.**

WT recipients (CD45.1) transplanted with  $1 \times 10^7$  BM mononuclear cells of either control (fl/fl) or Regnase-1-KO ( $\Delta/\Delta$ ) mice without irradiation. Representative flow cytometric analysis (a), quantitative and statistical analyses of BM cells and HSCs (b) in the BM of mice 12 weeks after transplantation (n = 4 per group; 2 independent experiments). (c) Representative gross appearance of the spleens from transplanted mice as indicated. The scale bars represent 1 cm. (d) Quantification of abnormal cells in the PB of mice 12 weeks after transplantation (n = 3 per group; 2 independent experiments). Error bars indicate mean  $\pm$  SD. \*p < 0.05; \*\*p < 0.01, \*\*\*p < 0.005, t-test.

## Supplementary Figure 6

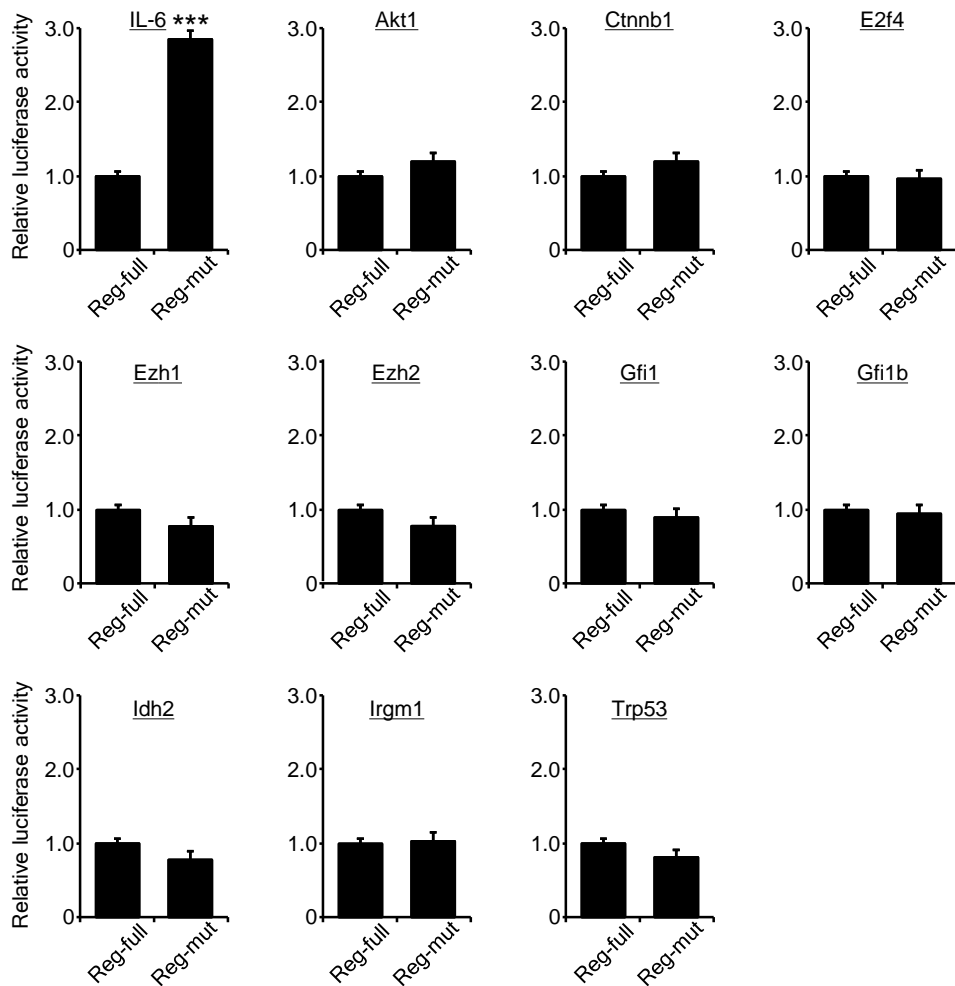

### Supplementary Figure 6. Identification of Regnase-1 target mRNAs in CD34<sup>+</sup> HSCs.

Luciferase activity of HEK293 cells transfected with luciferase reporter plasmids containing 3'UTRs of the indicated genes and either Regnase-1 expression plasmid or inactive Regnase-1 mutant plasmid (3 independent experiments). 3'UTR of *IL-6* was used as a positive control. Error bars indicate mean  $\pm$  SD. \*\*\* $p < 0.005$ , t-test.



Supplementary Figure 7

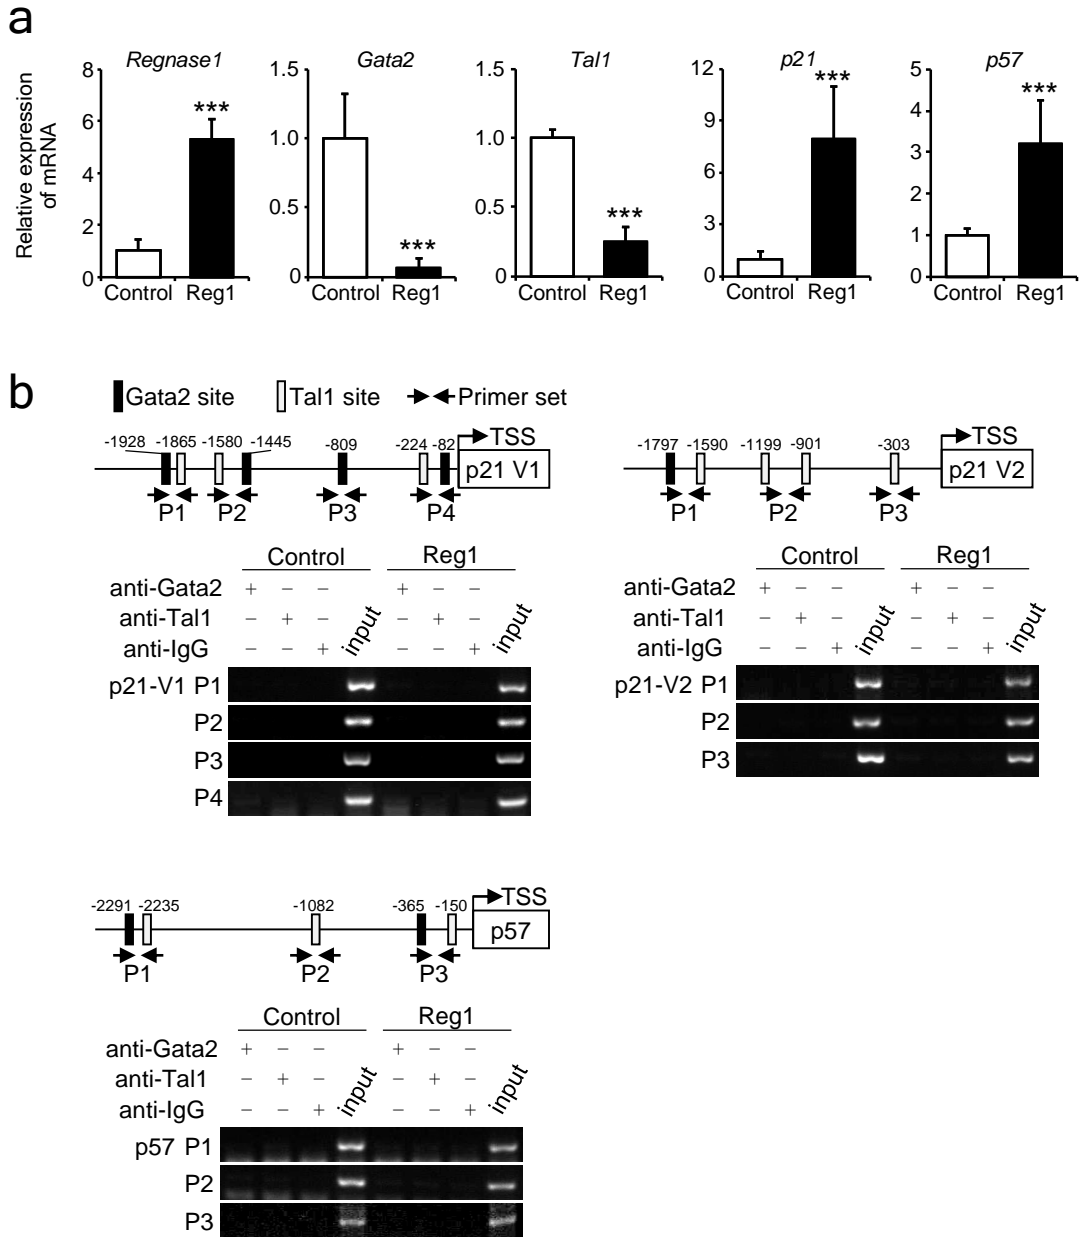

**Supplementary Figure 7. Examination of direct associations between Gata2/Tal2 and p21/p57.**

(a) qRT-PCR analysis of *Regnase-1*, *Gata2*, *Tal1*, *p21* and *p57* expression in THP1 cells transfected with Regnase-1 expression vector (Reg1) or control mock vector. Data are expressed as fold-change relative to control vector transfection (n = 3 per group). Error bars indicate mean  $\pm$  SD. \*\*\* p < 0.005, t-test. (b) Schematic representation of the positions of primers, transcription factor binding sites, and part of the first intron in the indicated human genes. The black box represents Gata2-binding sites and the white box represents Tal1 binding sites. Positions of primers used for ChIP are designated by arrows. Chromatin extracts from Regnase1-overexpressing or control THP1 cells were immunoprecipitated with an anti-human Gata2 antibody, Tal1 antibody or negative control IgG antibody. Immunoprecipitated promoter sequences were analyzed by PCR. Input DNA served as the technical positive control for PCR amplification.

## Supplementary Figure 8

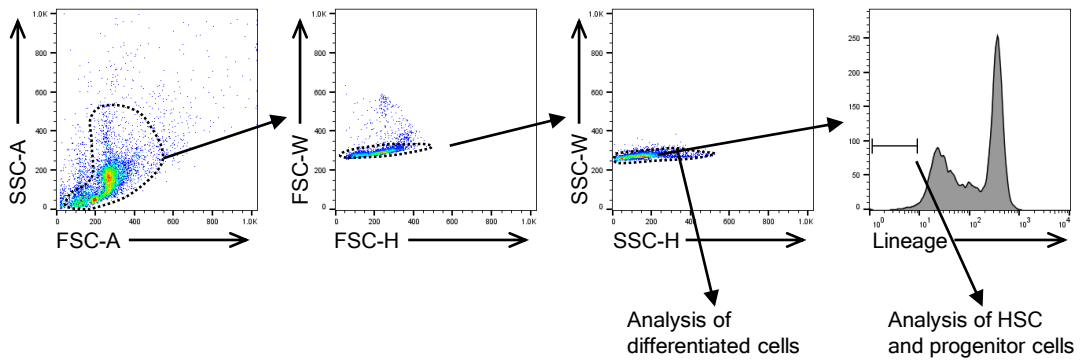

### Supplementary Figure 8. Gating strategies used for cell analysis and sorting.

Gating strategy to analyze and BM cells from control (fl/fl) and Regnase-1-KO ( $\Delta/\Delta$ ) mice (Fig. 1c,e,f, Fig. 2a-d, f-I, Fig. 3a,b, e,f,h,I,k,l, Fig. 4d-g,k-m and Fig. 7c-f, h,i).
