# Supplementary material for: Regnase-1-mediated post-transcriptional regulation is essential for hematopoietic stem and progenitor cell homeostasis
Source: PubMed Central journal article supplement (PMC6403248; doi:10.1038/s41467-019-09028-w), 2019-03-06
Supplement: 41467_2019_9028_MOESM3_ESM.pdf [file 41467_2019_9028_MOESM3_ESM.pdf]

## **Description of Additional Supplementary Files**

### Supplementary Data 1

Association of abnormal expression of Regnase-1 (ZC3H12A) mRNA and prognosis of cancer patients

### Supplementary Data 2

List of primer and Oligonucleotide sequences.

### Supplementary Data 3

Result of RNA-seq analysis of CD34<sup>-</sup> HSCs from Vav1-iCre; Reg1<sup>flox/flox</sup> mice (KO) and control Reg1<sup>flox/flox</sup> mice (Control).

### Supplementary Data 4

The gene sets identified by RNA-seq analysis used for the gene ontology analysis in Figure 2j.

### Supplementary Data 5

RNA-seq data in Figure 5g,h

Pre-defined gene sets which are related to leukemia used for the gene set enrichment analysis in Figure 5g,h.

### Supplementary Data 6

Summarized results of gene set enrichment analysis in Figure 5g,h.
